# Supplementary material for: Sperm DNA Methylation Epimutation Biomarkers for Male Infertility and FSH Therapeutic Responsiveness
Source: PubMed Central journal article supplement (PMC6856367; doi:10.1038/s41598-019-52903-1), 2019-11-14
Supplement: 41598_2019_52903_MOESM1_ESM.pdf [file 41598_2019_52903_MOESM1_ESM.pdf]

## Supplementary Table S1

**A**

| Unblinded Patient ID | Selection Failure | Biomarker Use |
|----------------------|-------------------|---------------|
| <b>Fertile</b>       |                   |               |
| Fer 010              | no                | yes           |
| Fer 011              | no                | yes           |
| Fer 012              | no                | yes           |
| Fer 013              | no                | yes           |
| Fer 017              | no                | yes           |
| Fer 018              | no                | yes           |
| Fer 020              | no                | yes           |
| Fer 021              | no                | yes           |
| Fer 027              | no                | yes           |

**Infertile**

|         |    |     |
|---------|----|-----|
| Inf 001 | no | yes |
| Inf 002 | no | yes |
| Inf 003 | no | yes |
| Inf 005 | no | yes |
| Inf 006 | no | yes |
| Inf 007 | no | yes |
| Inf 009 | no | yes |
| Inf 012 | no | yes |
| Inf 015 | no | yes |
| Inf 016 | no | yes |
| Inf 017 | no | yes |
| Inf 018 | no | yes |
| Inf 019 | no | yes |

**B**

| Unblinded Patient ID | Selection Failure | Biomarker Use |
|----------------------|-------------------|---------------|
|----------------------|-------------------|---------------|

**Samples with Selection Failure**

**Fertile**

|             |     |    |
|-------------|-----|----|
| Fer 006     | yes | no |
| Fer 007     | yes | no |
| Fer 008     | yes | no |
| Fer 009     | yes | no |
| Fer 014     | yes | no |
| Fer 015     | yes | no |
| Fer 016     | yes | no |
| Fer 019     | yes | no |
| Fer 022     | yes | no |
| Fer 023     | yes | no |
| Fer 024     | yes | no |
| Fer Uncoded | yes | no |
| Fer Uncoded | yes | no |
| Fer Uncoded | yes | no |

**Infertile**

|             |     |    |
|-------------|-----|----|
| Inf 008     | yes | no |
| Inf 020     | yes | no |
| Inf 021     | yes | no |
| Inf Uncoded | yes | no |

**C**

|                               | Pre-volume0 | Pre-conc0  | Pre-motile0 | Pre-immotile0 | Pre-TMC0 |
|-------------------------------|-------------|------------|-------------|---------------|----------|
| <b>SPERM UPON RECRUITMENT</b> |             |            |             |               |          |
|                               | Volsem0     | Concsperm0 | Motile0     | Inmotile0     | TMC      |
| INF001                        | 2.50        | 10.00      | 25.00       | 75.00         | 6.2      |
| INF002                        | 3.00        | 4.00       | 3.00        | 97.00         | 3.6      |
| INF003                        | 2.00        | 5.00       | 25.00       | 75.00         | 2.5      |
| INF005                        | 4.00        | 1.00       | 3.00        | 97.00         | 1.2      |
| INF007                        | 3.10        | 1.50       | 5.00        | 95.00         | 2.3      |
| INF009                        | 3.00        | 2.00       | 4.00        | 96.00         | 2.4      |
| INF012                        | 4.00        | 1.00       | 1.00        | 99.00         | 0.4      |
| INF015                        | 1.00        | 1.00       | 25.00       | 75.00         | 0.2      |
| INF016                        | 3.00        | 4.00       | 15.00       | 85.00         | 1.8      |
| INF017                        | 3.70        | 1.00       | 20.00       | 80.00         | 0.7      |
| INF018                        | 3.00        | 8.00       | 20.00       | 80.00         | 4.8      |
| INF019                        | 4.00        | 2.00       | 5.00        | 95.00         | 4        |

**D**

|                             | Pre-volume1 | Pre-conc1  | Pre-motile1 | Pre-immotile1 | Pre-TMC1 |
|-----------------------------|-------------|------------|-------------|---------------|----------|
| <b>SPERM BEFORE THERAPY</b> |             |            |             |               |          |
|                             | VolSem1     | Concsperm1 | Motile1     | Inmotile1     | TMC      |
| INF001                      | 1           | 2          | 20          | 80            | 0.4      |
| INF002                      | 0.5         | 0.5        | 10          | 90            | 0.02     |
| INF003                      | 4           | 4          | 16          | 84            | 2.5      |
| INF005                      | 1.2         | 1.2        | 3.6         | 96.4          | 0.05     |
| INF007                      | 0.5         | 0.5        | 7           | 93            | 0.01     |
| INF009                      | 4           | 4          | 7.4         | 92.6          | 1.1      |
| INF012                      | 3           | 3          | 25          | 75            | 2.2      |
| INF015                      | 2           | 2          | 20          | 80            | 0.8      |
| INF016                      | 6           | 6          | 15          | 85            | 5.4      |
| INF017                      | 4           | 6          | 10          | 90            | 2.4      |
| INF018                      | 2           | 2          | 10          | 90            | 0.4      |
| INF019                      | 1           | 1          | 20          | 80            | 0.2      |

**E**

|                            | Post-volume2 | Post-conc2 | Post-motile2 | Post-immotile2 | Post-TMC2 |
|----------------------------|--------------|------------|--------------|----------------|-----------|
| <b>SPERM AFTER THERAPY</b> |              |            |              |                |           |
|                            | Volsem2      | Concsperm2 | Motile2      | Inmotile2      | TMC       |
| INF001                     | 2            | 3          | 20           | 80             | 1.2       |
| INF002                     | 6            | 0.5        | 6.4          | 93.6           | 0.1       |
| INF003                     | 3            | 0.1        | 1            | 99             | 0.003     |
| INF005                     | 2            | 1.2        | 3.6          | 96.4           | 0.08      |
| INF007                     | 4            | 1          | 10           | 90             | 0.4       |
| INF009                     | 1.7          | 3          | 9.4          | 90.6           | 0.4       |
| INF012                     | 2.5          | 10         | 20           | 80             | 5         |
| INF015                     | 2            | 2          | 20           | 80             | 0.8       |
| INF016                     | 3            | 11         | 35           | 65             | 8.2       |
| INF017                     | 2            | 15         | 25           | 75             | 7.5       |
| INF018                     | 3            | 20         | 15           | 85             | 9         |
| INF019                     | 3            | 0.3        | 2            | 98             | 0.1       |
