# Supplementary material for: Sperm DNA Methylation Epimutation Biomarkers for Male Infertility and FSH Therapeutic Responsiveness
Source: PubMed Central journal article supplement (PMC6856367; doi:10.1038/s41598-019-52903-1), 2019-11-14
Supplement: 41598_2019_52903_MOESM3_ESM.pdf [file 41598_2019_52903_MOESM3_ESM.pdf]

**Supplementary Table S3**  
**Non-Responder versus Responder**

| DMR Name        | Chr | Start     | Stop      | Length | # Sig Win | minP     | maxLFC     | CpG # | CpG Density | Gene Annotation              | Gene Category              |
|-----------------|-----|-----------|-----------|--------|-----------|----------|------------|-------|-------------|------------------------------|----------------------------|
| DMR1:17235001   | 1   | 17235001  | 17236000  | 1000   | 1         | 9.11E-07 | 1.0645622  | 12    | 1.2         | PAD1                         | Metabolism                 |
| DMR1:25292001   | 1   | 25292001  | 25294000  | 2000   | 1         | 9.84E-09 | -2.1663744 | 11    | 0.55        | RSRP1;RHD;SDHDP6             | Transport                  |
| DMR1:25299001   | 1   | 25299001  | 25300000  | 1000   | 1         | 2.76E-09 | -1.8483392 | 23    | 2.3         | RSRP1;RHD;SDHDP6             | Transport                  |
| DMR1:25304001   | 1   | 25304001  | 25305000  | 1000   | 1         | 8.29E-06 | -1.8151307 | 19    | 1.9         | RSRP1;RHD;SDHDP6             | Transport                  |
| DMR1:25318001   | 1   | 25318001  | 25319000  | 1000   | 1         | 1.70E-07 | -2.0585241 | 15    | 1.5         | RSRP1;RHD                    | Transport                  |
| DMR1:25333001   | 1   | 25333001  | 25334000  | 1000   | 1         | 2.49E-06 | -1.3360508 | 16    | 1.6         | RSRP1;RHD;AL928711.1;TMEM50A | Transport                  |
| DMR1:218548001  | 1   | 218548001 | 218549000 | 1000   | 1         | 7.63E-06 | -1.2569819 | 13    | 1.3         | RF00012                      |                            |
| DMR2:163904001  | 2   | 163904001 | 163905000 | 1000   | 1         | 6.54E-06 | -1.4222477 | 4     | 0.4         | AC016766.1                   |                            |
| DMR3:9159001    | 3   | 9159001   | 9160000   | 1000   | 1         | 7.15E-06 | -1.0760625 | 13    | 1.3         | SRGAP3                       | Signaling                  |
| DMR3:18212001   | 3   | 18212001  | 18213000  | 1000   | 1         | 1.06E-06 | -1.4381627 | 5     | 0.5         | TBC1D5                       | Signaling                  |
| DMR3:25359001   | 3   | 25359001  | 25360000  | 1000   | 1         | 8.09E-06 | -1.2918398 | 3     | 0.3         | RARB;RNA5SP126               | Signaling                  |
| DMR3:36185001   | 3   | 36185001  | 36186000  | 1000   | 1         | 1.81E-07 | -1.3766023 | 5     | 0.5         |                              |                            |
| DMR3:111089001  | 3   | 111089001 | 111090000 | 1000   | 1         | 8.67E-07 | -1.5806562 | 8     | 0.8         | NECTIN3                      |                            |
| DMR3:118291001  | 3   | 118291001 | 118293000 | 2000   | 1         | 4.57E-08 | -1.4412971 | 12    | 0.6         | AC068633.1                   |                            |
| DMR3:120974001  | 3   | 120974001 | 120977000 | 3000   | 1         | 5.90E-06 | -1.2434688 | 20    | 0.667       | STXBP5L                      | Transcription              |
| DMR4:164482001  | 4   | 164482001 | 164483000 | 1000   | 1         | 2.00E-06 | 1.3078442  | 4     | 0.4         |                              |                            |
| DMR4:170150001  | 4   | 170150001 | 170151000 | 1000   | 1         | 4.27E-07 | -1.5550518 | 4     | 0.4         | AC069306.1                   |                            |
| DMR4:187047001  | 4   | 187047001 | 187048000 | 1000   | 1         | 8.29E-06 | 1.1028096  | 16    | 1.6         | AC110772.2                   |                            |
| DMR5:15460001   | 5   | 15460001  | 15461000  | 1000   | 1         | 5.64E-06 | -0.9900734 | 6     | 0.6         | AC114964.1                   |                            |
| DMR5:20858001   | 5   | 20858001  | 20859000  | 1000   | 1         | 8.86E-06 | -1.1168998 | 7     | 0.7         | LINC02241                    |                            |
| DMR5:84058001   | 5   | 84058001  | 84059000  | 1000   | 1         | 3.43E-06 | -1.3418608 | 7     | 0.7         | EDIL3                        | Extracellular Matrix       |
| DMR5:113458001  | 5   | 113458001 | 113460000 | 2000   | 1         | 6.47E-06 | 1.1312994  | 31    | 1.55        | MCC                          | Transcription              |
| DMR5:122270001  | 5   | 122270001 | 122271000 | 1000   | 1         | 8.74E-07 | -1.3435475 | 4     | 0.4         |                              |                            |
| DMR6:5284001    | 6   | 5284001   | 5285000   | 1000   | 1         | 2.64E-06 | -1.2871156 | 11    | 1.1         | FARS2;AL121978.1             |                            |
| DMR6:169552001  | 6   | 169552001 | 169554000 | 2000   | 1         | 3.18E-06 | 1.5327536  | 42    | 2.1         | AL031315.1;WDR27             |                            |
| DMR7:69279001   | 7   | 69279001  | 69280000  | 1000   | 1         | 4.90E-06 | 1.0949466  | 11    | 1.1         | AC092100.1                   |                            |
| DMR7:119280001  | 7   | 119280001 | 119281000 | 1000   | 1         | 3.05E-07 | -1.1363468 | 5     | 0.5         |                              |                            |
| DMR8:10912001   | 8   | 10912001  | 10913000  | 1000   | 1         | 1.65E-06 | -1.6874264 | 7     | 0.7         | XKR6                         | Immune                     |
| DMR8:55562001   | 8   | 55562001  | 55563000  | 1000   | 1         | 7.25E-06 | -1.2043517 | 4     | 0.4         |                              |                            |
| DMR9:17319001   | 9   | 17319001  | 17320000  | 1000   | 1         | 9.15E-06 | -1.3272344 | 5     | 0.5         | CNTLN                        |                            |
| DMR9:22122001   | 9   | 22122001  | 22123000  | 1000   | 1         | 1.03E-07 | -1.5186233 | 5     | 0.5         | CDKN2B-AS1;RF01909           |                            |
| DMR9:65745001   | 9   | 65745001  | 65746000  | 1000   | 1         | 6.00E-06 | -1.2615133 | 7     | 0.7         | FOXD4L4                      |                            |
| DMR9:89370001   | 9   | 89370001  | 89374000  | 4000   | 1         | 9.89E-06 | 1.2449168  | 56    | 1.4         | SEMA4D                       | Development                |
| DMR9:124203001  | 9   | 124203001 | 124204000 | 1000   | 1         | 2.36E-06 | 1.1490304  | 18    | 1.8         |                              |                            |
| DMR9:130473001  | 9   | 130473001 | 130474000 | 1000   | 1         | 1.19E-06 | 1.6118581  | 23    | 2.3         | ASS1                         | Development                |
| DMR9:134476001  | 9   | 134476001 | 134477000 | 1000   | 1         | 6.96E-08 | -1.300523  | 12    | 1.2         |                              |                            |
| DMR10:559001    | 10  | 559001    | 560000    | 1000   | 1         | 4.86E-06 | 1.0297783  | 21    | 2.1         | DIP2C                        |                            |
| DMR10:3718001   | 10  | 3718001   | 3719000   | 1000   | 1         | 1.33E-06 | 1.5500791  | 16    | 1.6         |                              |                            |
| DMR10:7136001   | 10  | 7136001   | 7137000   | 1000   | 1         | 9.63E-07 | -1.6184753 | 14    | 1.4         |                              |                            |
| DMR10:36569001  | 10  | 36569001  | 36570000  | 1000   | 1         | 1.59E-07 | -1.4504064 | 20    | 2           |                              |                            |
| DMR11:19552001  | 11  | 19552001  | 19553000  | 1000   | 1         | 1.12E-06 | 1.327054   | 18    | 1.8         | NAV2                         | Development                |
| DMR11:126188001 | 11  | 126188001 | 126189000 | 1000   | 1         | 1.92E-06 | 0.991244   | 21    | 2.1         | AP001893.2                   |                            |
| DMR12:62236001  | 12  | 62236001  | 62238000  | 2000   | 1         | 6.81E-06 | -1.1166275 | 22    | 1.1         | FAM19A2;KLF17P1              | Growth Factors & Cytokines |
| DMR12:121750001 | 12  | 121750001 | 121752000 | 2000   | 1         | 9.27E-06 | 1.3819881  | 18    | 0.9         | TMEM120B                     | Unknown                    |
| DMR12:131647001 | 12  | 131647001 | 131648000 | 1000   | 1         | 7.17E-06 | 1.084876   | 23    | 2.3         | AC117500.4;LINC02414         |                            |
| DMR13:37820001  | 13  | 37820001  | 37821000  | 1000   | 1         | 8.53E-08 | -1.8339284 | 4     | 0.4         | TRPC4                        | Development                |
| DMR14:81859001  | 14  | 81859001  | 81860000  | 1000   | 1         | 1.86E-06 | -1.3402382 | 14    | 1.4         | AL355838.1                   |                            |
| DMR16:23408001  | 16  | 23408001  | 23409000  | 1000   | 1         | 2.13E-06 | 1.2552037  | 34    | 3.4         | COG7;RN7SKP23                | Golgi                      |
| DMR16:28375001  | 16  | 28375001  | 28376000  | 1000   | 1         | 1.44E-06 | 1.3194317  | 13    | 1.3         | AC138894.3;EIF3CL            | Translation                |
| DMR17:45915001  | 17  | 45915001  | 45916000  | 1000   | 1         | 8.73E-06 | 0.8078421  | 12    | 1.2         | MAPT;CR936218.2              | Cytoskeleton               |
| DMR17:46235001  | 17  | 46235001  | 46236000  | 1000   | 1         | 4.74E-06 | 1.0572367  | 13    | 1.3         | KANSL1;MAPK8IP1P1            |                            |
| DMR17:46297001  | 17  | 46297001  | 46298000  | 1000   | 1         | 5.15E-06 | 0.9689937  | 11    | 1.1         | ARL17B;LRRC37A               | Signaling                  |
| DMR17:73426001  | 17  | 73426001  | 73428000  | 2000   | 1         | 4.27E-06 | -1.3244611 | 24    | 1.2         | SDK2                         | Development                |
| DMR19:2712001   | 19  | 2712001   | 2715000   | 3000   | 1         | 3.78E-06 | 1.1579408  | 43    | 1.433       | GNNG7;DIRAS1;AC006538.2      | Signaling                  |
| DMR20:29885001  | 20  | 29885001  | 29886000  | 1000   | 1         | 2.32E-06 | 1.3647393  | 5     | 0.5         | DUX4L37                      |                            |
| DMRX:119779001  | X   | 119779001 | 119780000 | 1000   | 1         | 7.18E-06 | 1.161398   | 21    | 2.1         | SNORA69;RPL39                | Translation                |
